# Supplementary material for: Nanocellulose Xerogel as Template for Transparent, Thick, Flame-Retardant Polymer Nanocomposites
Source: MDPI journal article supplement (doi:10.3390/nano11113032), 2021-11-12
Supplement: s1 [file s1]

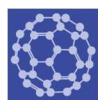

## Supplementary Materials

# Nanocellulose Xerogel as Template for Transparent, Thick, Flame-Retardant Polymer Nanocomposites

Wataru Sakuma <sup>1,\*</sup>, Shuji Fujisawa <sup>1</sup>, Lars A. Berglund <sup>2</sup> and Tsuguyuki Saito <sup>1,\*</sup>

<sup>1</sup> Department of Biomaterial Sciences, Graduate School of Agricultural and Life Sciences, The University of Tokyo, 1-1-1 Yayoi, Bunkyo-ku, Tokyo 113-8657, Japan; afujisawa@g.ecc.u-tokyo.ac.jp

<sup>2</sup> Department of Fibre and Polymer Technology, Wallenberg Wood Science Center, KTH Royal Institute of Technology, SE-100 44 Stockholm, Sweden; blund@kth.se

\* Correspondence: sakuma.wataru@gmail.com (W.S.), saitot@g.ecc.u-tokyo.ac.jp (T.S.); Tel.: +81-3-5841-5271 (T.S.)

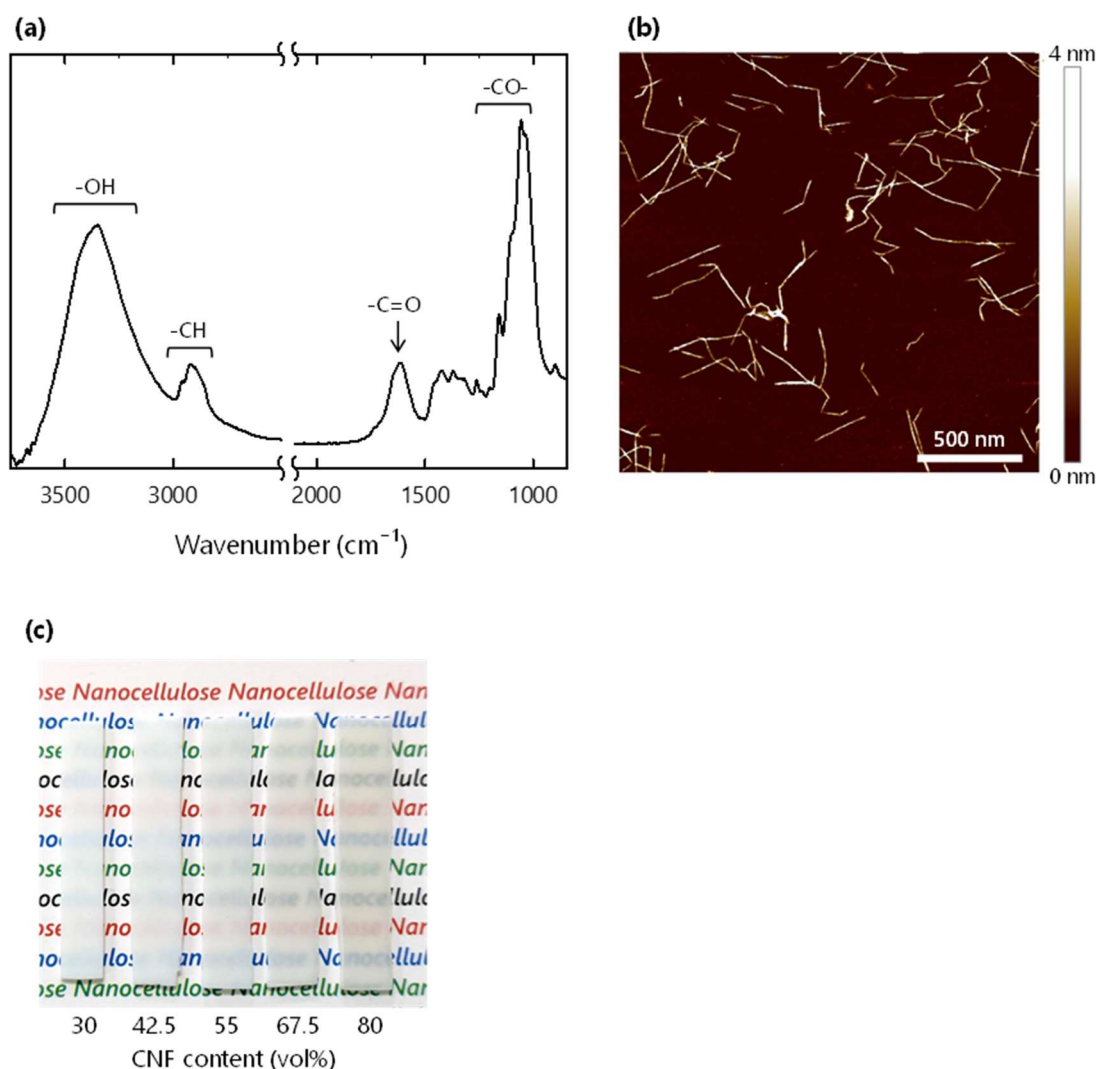

**Figure S1.** (a) FTIR spectrum and (b) AFM height image of the CNFs prepared in this study; (c) Appearance of the CNF xerogels with different bulk densities (thickness 1 mm). The FTIR spectrum (panel a) shows typical characteristics for TEMPO-oxidized cellulose [18]; the absorption peaks at approximately 3200–3500 cm<sup>-1</sup>, 2900 cm<sup>-1</sup>, 1600 cm<sup>-1</sup> and 1000–1200 cm<sup>-1</sup> are due to the stretching vibrations of the -OH, -CH, -C=O and -CO- moieties in TEMPO-oxidized cellulose, respectively.

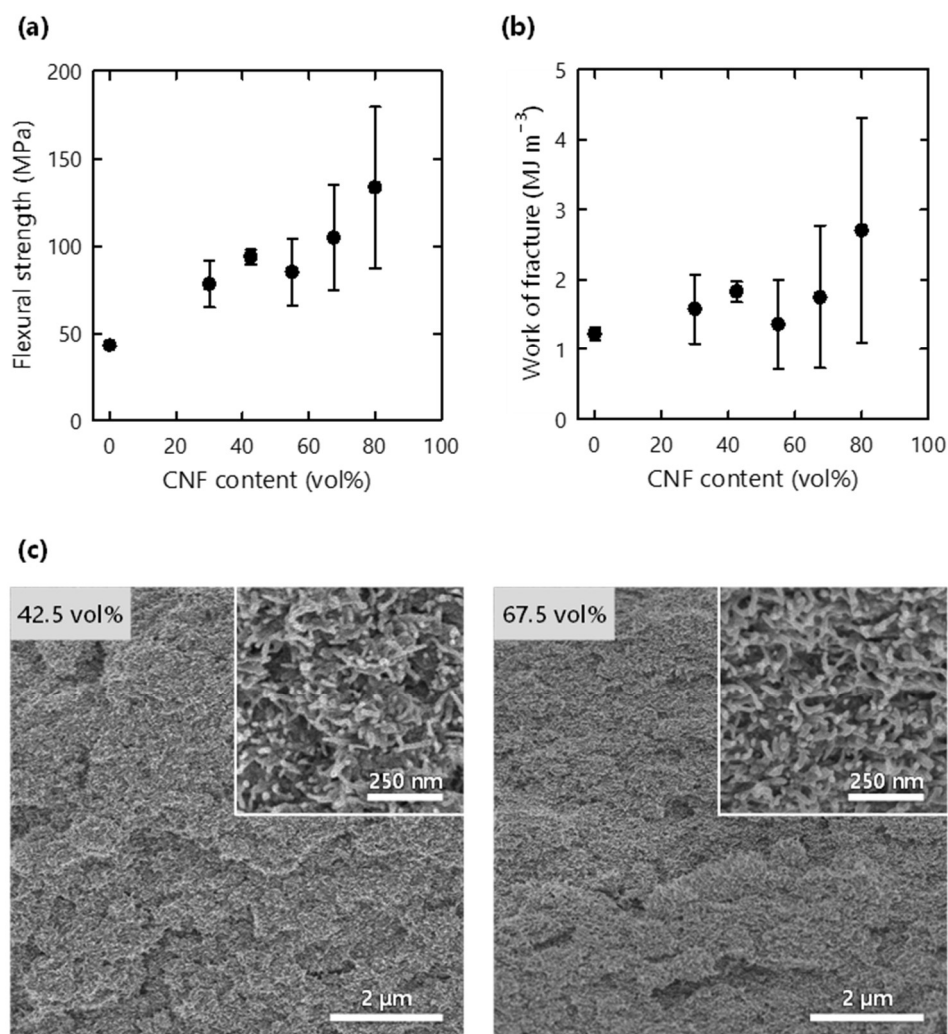

**Figure S2.** (a) Flexural strength and (b) work of fracture of composites as functions of CNF content; (c) SEM images of fractured surfaces of composites.

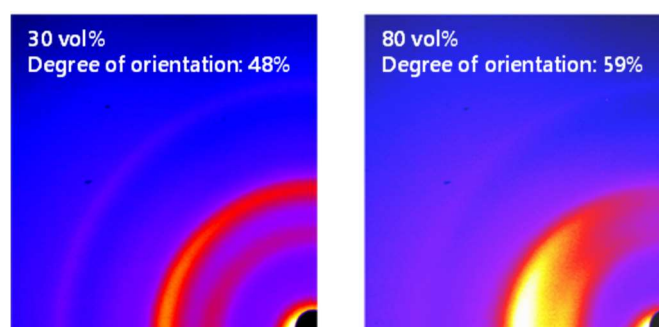

**Figure S3.** X-ray diffraction patterns of xerogels for incident beam parallel to in plane.

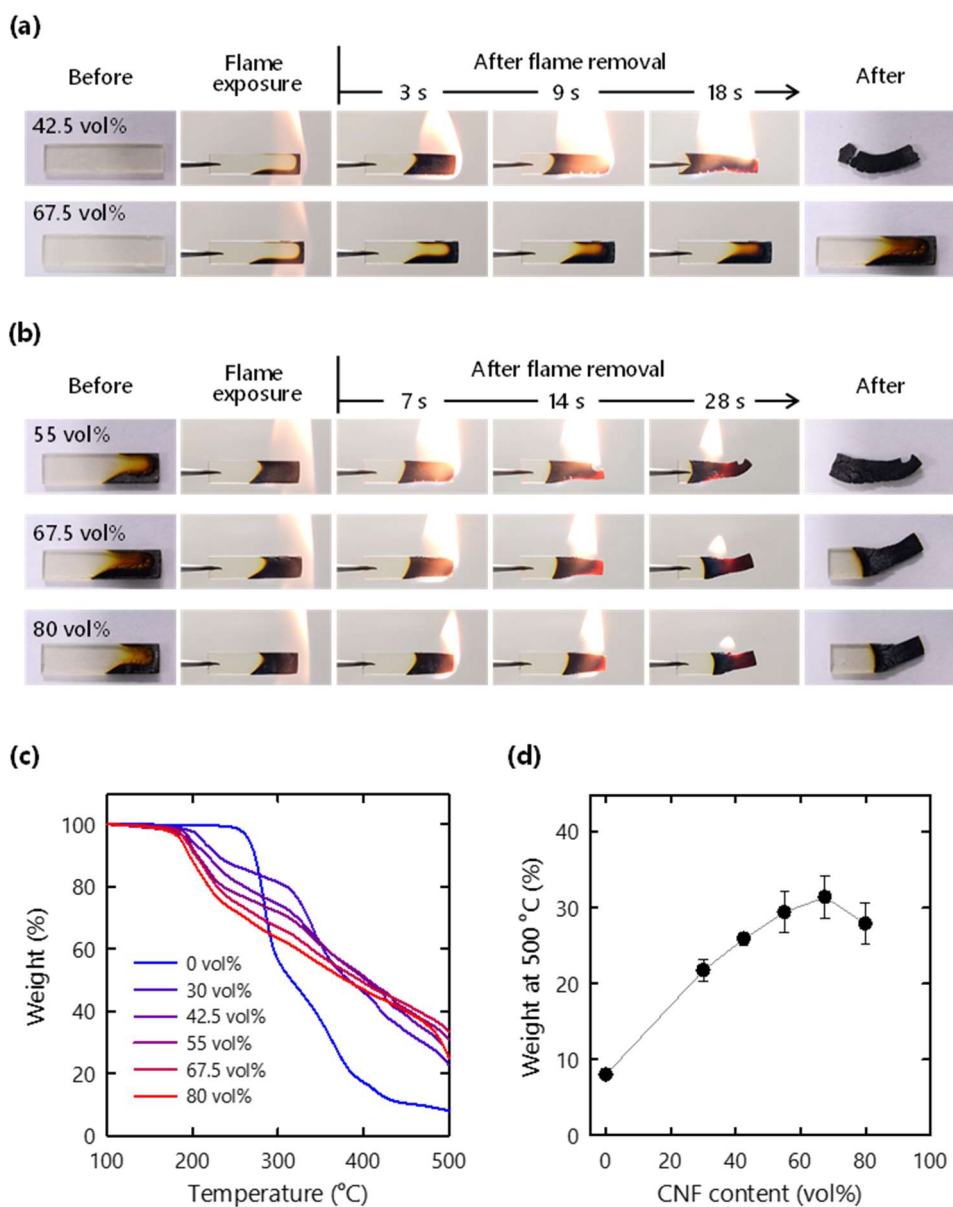

**Figure S4.** (a) Flammability test of CNF composites; (b) Additional flammability test of CNF composites with high CNF content; (c) TG curves of CNF composites under air conditions; (d) Residue weight at 500 °C based on TG analysis under air conditions.
